# Supplementary material for: The DNA sensor AIM2 mediates psoriasiform inflammation by inducing type 3 immunity
Source: JCI journal article supplement (doi:10.1172/jci.insight.171894), 2024-10-01
Supplement: sd1 [file 1]

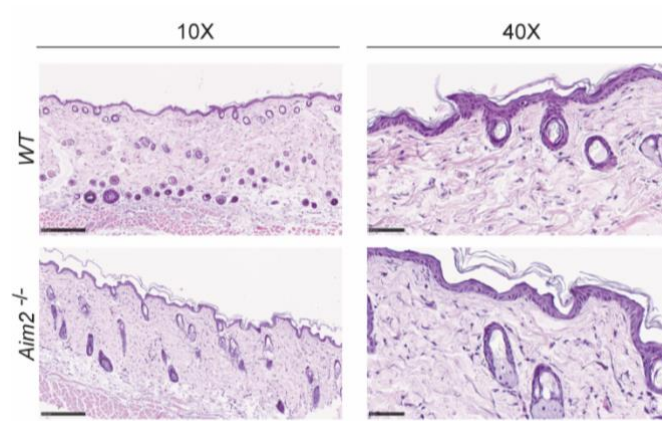

**Figure S1: Skin morphology of naïve WT and *Aim2*<sup>-/-</sup> mice.** Representative sections of back skin from naïve WT (C57BL/6) and *Aim2*<sup>-/-</sup> mice stained with H&E (acquired at 10x and 40x magnification). Scale bars, 100  $\mu$ m and 50  $\mu$ m.

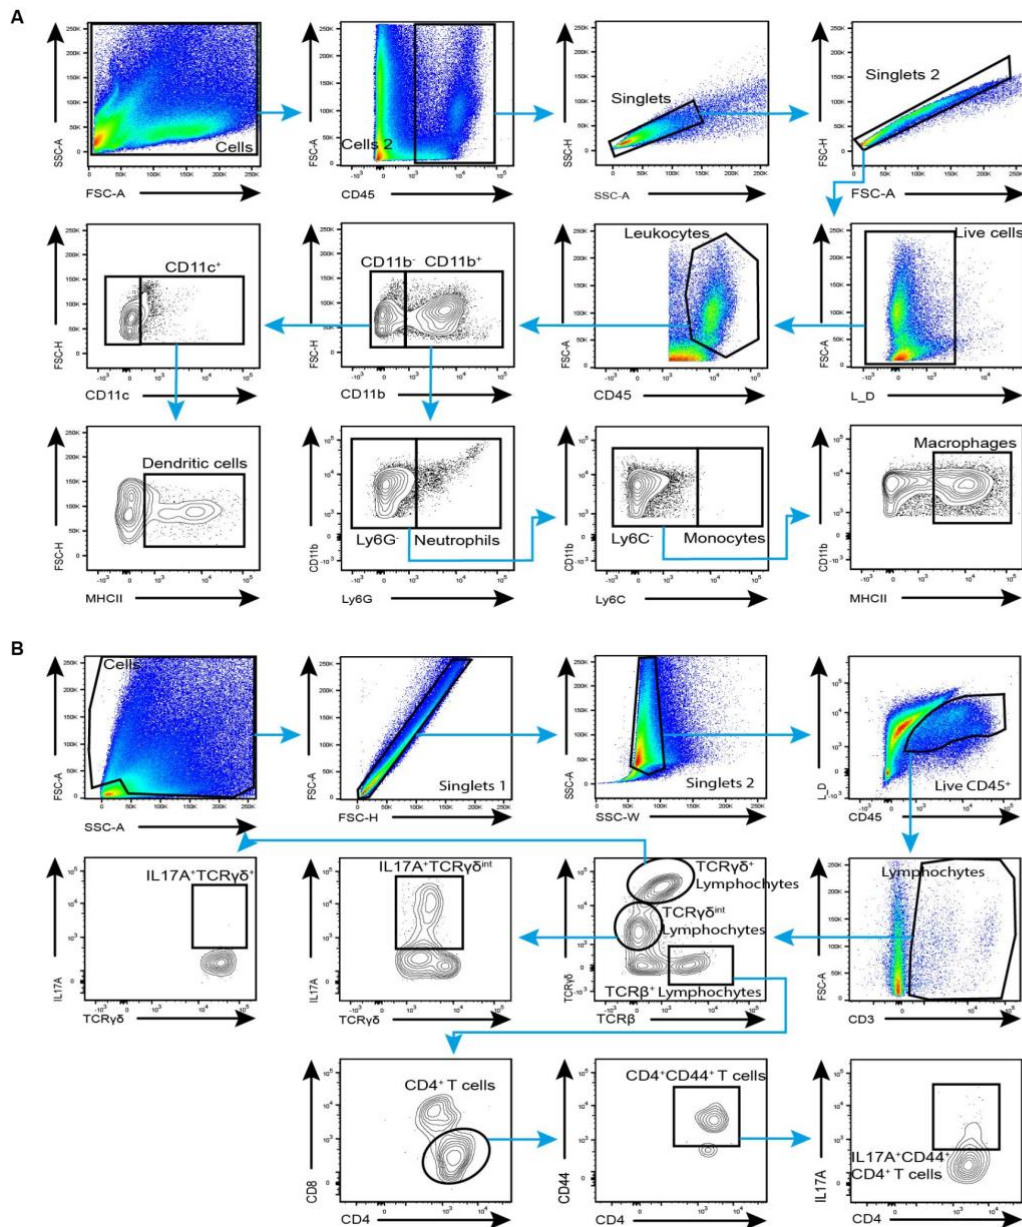

**Figure S2: Gating strategy for flow cytometry analyses.** (A) Representative gating strategy for myeloid cells in the skin. (B) Representative gate strategies for lymphoid cells in the skin. All analyzes were performed using Flowjo X software.

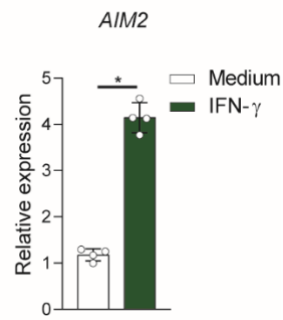

**Figure S3: Induction of AIM2 expression in keratinocytes by IFN- $\gamma$ .** Relative mRNA expressions of *AIM2* in HaCaT cells determined by qPCR and normalized to *Gapdh* (n=4 per group). The graph represents the mean  $\pm$  SEM of data obtained from 2 independent experiments. Statistical analysis was performed by two-tailed unpaired Student's t test, \* $P < 0.05$

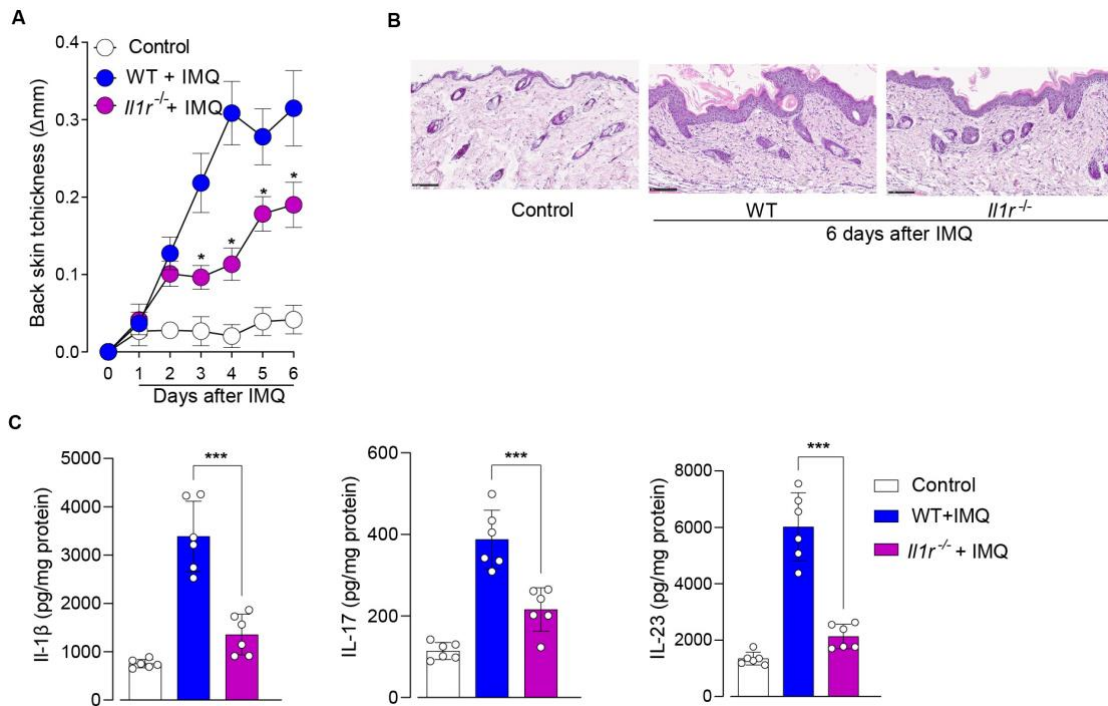

**Figure S4: IL-1R is involved in the development of psoriasis-like skin inflammation (A-C)** WT and *Il1r*<sup>-/-</sup> mice after 6 days of IMQ treatment. Untreated WT mice were used as controls. **(A)** Time course of changes in the back-skin thickness (delta) measured daily after topical IMQ application by caliper (n=6 per group). **(B)** Representation of hematoxylin and eosin (H&E) staining of back-skin sections of animals. Acquired at 20x magnification. The scale bar indicates 100 μm (n=6 per group). **(C)** IL-1β, IL-23, and IL-17 levels in skin homogenates determined by ELISA (n = 6 per group). Data are representative of 2 independent experiments and are shown as mean ± SEM. Statistical significance was evaluated by two-way (A) or one-way (C) ANOVA followed by Bonferroni's post hoc test, \**P* < 0.05.

**Table S1 - Primers used in this study**

|                     |                          |
|---------------------|--------------------------|
| KRT14 – Forward     | GGCCTGCTGAGATCAAAGACTAC  |
| KRT14 – Reverse     | CACTGTGGCTGTGAGAATCTTGTT |
| Lcn2 – Forward      | CCCCATCTCTGCTCACTGTC     |
| Lcn2 – Reverse      | TTTTTCTGGACCGCATTG       |
| S100A9 – Forward    | GCAGCUGGAACGCAACAUA      |
| S100A9 – Reverse    | UAUGUUGCGUCCAGCUGC       |
| Caspase 1 – Forward | GGCACATTTCCAGGACTGACTG   |
| Caspase 1 – Reverse | GCAAGACGTGTACGAGTGGTTG   |
| AIM2 – Forward      | AGGCTGCTACAGAAGTCTGTCC   |
| AIM2– Reverse       | TCAGCACCGTGACAACAAGTGG   |
| IL-1 beta – Forward | GAAATGCCACCTTTTGACAGTG   |
| Il-1 beta – Reverse | TGGATGCTCTCATCAGGACAG    |
