# Supplementary material for: The DNA sensor AIM2 mediates psoriasiform inflammation by inducing type 3 immunity
Source: JCI journal article supplement (doi:10.1172/jci.insight.171894), 2024-10-01

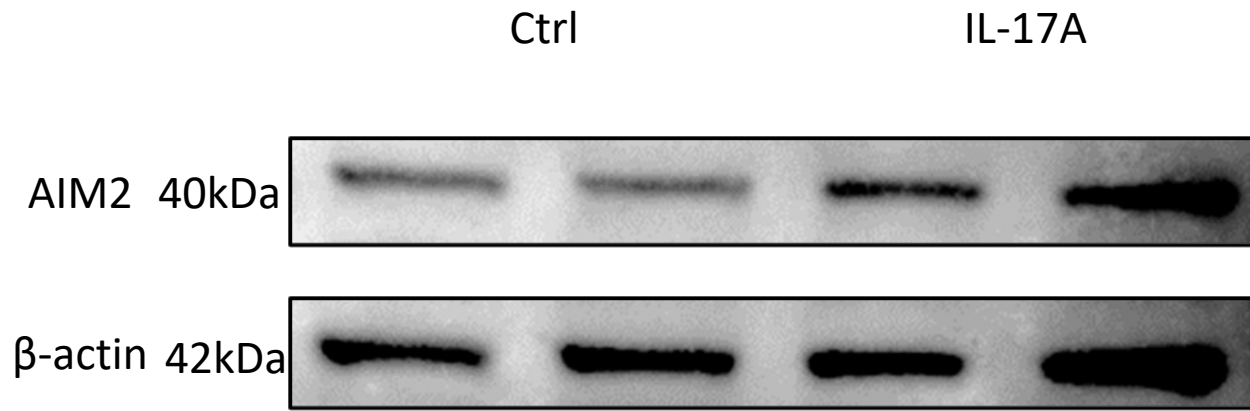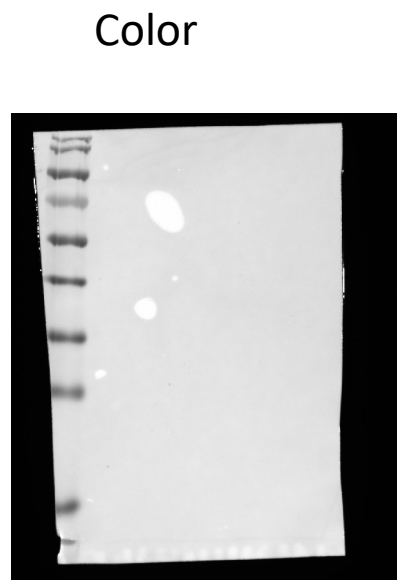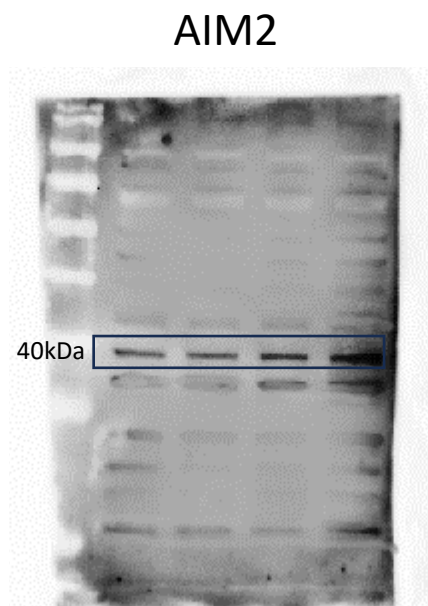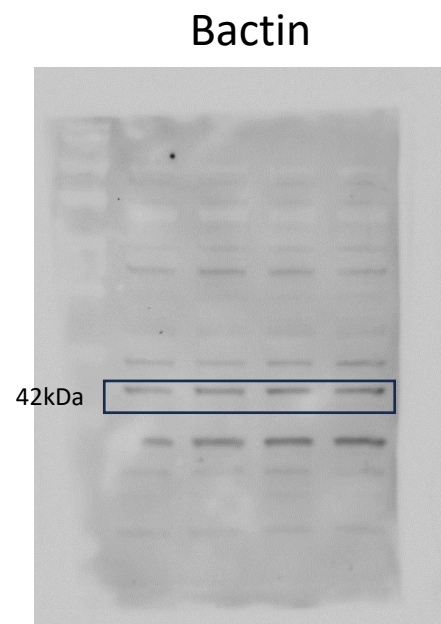

Supplement: sd2 [file 2]
